# Supplementary material
Source: publisher figshare collection journal article supplement (https://gsajournals.figshare.com/ndownloader/files/25205633)
Supplement: Supplementary file 1 [file 25205633]

## Sheet: Genes_Top Three GO SNPs
Trait	Sex	GO Term (SNPs)	Go Term Description and Definition	Gene	Gene Name	Gene Symbol	GO Biological Process	GO Molecular Function
Chill Coma Recovery	Females and Males	GO:0033588	Elongator holoenzyme complex | Elongator core complex. A heterohexameric protein complex that is involved in modification of wobble nucleosides in tRNA. The complex can associate physically with hyperphosphorylated RNA polymerase II; it contains two discrete heterotrimeric subcomplexes.	FBgn0031604	Elongator complex protein 3	Elp3	synaptic growth at neuromuscular junction ; GO:0051124 | cytoskeletal matrix organization at active zone ; GO:0048789 | locomotory behavior ; GO:0007626 | regulation of photoreceptor cell axon guidance ; GO:2000289 | histone acetylation ; GO:0016573 |regulation of transcription by RNA polymerase II ; GO:0006357 | peptidyl-lysine acetylation ; GO:0018394 | tRNA wobble base 5-methoxycarbonylmethyl-…	iron-sulfur cluster binding ; GO:0051536 | acetyltransferase activity ; GO:0016407 | phosphorylase kinase regulator activity ; GO:0008607
				FBgn0031711	-	CG6907	tRNA wobble uridine modification ; GO:0002098 | regulation of transcription by RNA polymerase II ; GO:0006357 | regulation of transcription by RNA polymerase II ; GO:0006357	phosphorylase kinase regulator activity ; GO:0008607
				FBgn0015359	-	CG2034	tRNA wobble uridine modification ; GO:0002098	-
				FBgn0037926	Elongator complex protein 1	Elp1	tRNA wobble uridine modification ; GO:0002098 | dosage compensation by hyperactivation of X chromosome ; GO:0009047	-
				FBgn0086371	poly	poly	tRNA wobble uridine modification ; GO:0002098 | positive regulation of insulin receptor signaling pathway ; GO:0046628 | oocyte microtubule cytoskeleton polarization ; GO:0008103 | melanotic encapsulation of foreign target ; GO:0035011	insulin receptor binding ; GO:0005158
	Females	GO:0003746	translation elongation factor activity. Functions in chain elongation during polypeptide synthesis at the ribosome.	FBgn0263133	mitochondrial translation elongation factor G 1	mEFG1	mitochondrial translational elongation ; GO:0070125 |mitochondrial translational elongation ; GO:0070125 |	GTP binding ; GO:0005525 | GTPase activity ; GO:0003924 |translation elongation factor activity ; GO:0003746
				FBgn0032198	eukaryotic translation elongation factor 1 delta	eEF1delta	translational elongation ; GO:0006414	translation elongation factor activity ; GO:0003746 | guanyl-nucleotide exchange factor activity ; GO:0005085
				FBgn0032646	mitochondrial translation elongation factor Ts	mEFTs	mitochondrial translational elongation ; GO:0070125 | translational elongation ; GO:0006414	translation elongation factor activity ; GO:0003746
				FBgn0000559	eukaryotic translation elongation factor 2	eEF2	translational elongation ; GO:0006414	GTP binding ; GO:0005525 | ribosome binding ; GO:0043022 | GTPase activity ; GO:0003924 | translation elongation factor activity ; GO:0003746
				FBgn0033184	mitochondrial translation elongation factor Tu 2	mEFTu2	translational elongation ; GO:0006414 | mitochondrial translational elongation ; GO:0070125	GTP binding ; GO:0005525 | GTPase activity ; GO:0003924 | translation elongation factor activity ; GO:0003746
				FBgn0034627	eukaryotic translation elongation factor, selenocysteine-specific	eEFSec	translational readthrough ; GO:0006451 | translational elongation ; GO:0006414 | selenocysteine incorporation ; GO:0001514	GTP binding ; GO:0005525 | GTPase activity ; GO:0003924 | translation elongation factor activity ; GO:0003746 | GTPase activating protein binding ; GO:0032794
				FBgn0035587	Gdap1	Gdap1	protein targeting to mitochondrion ; GO:0006626 | mitochondrial fusion ; GO:0008053 | mitochondrion organization ; GO:0007005 | mitochondrial fission ; GO:0000266	-
				FBgn0039566	-	CG4849	mRNA splicing, via spliceosome ; GO:0000398 | translational elongation ; GO:0006414 | positive regulation of gene expression ; GO:0010628	GTP binding ; GO:0005525 | U5 snRNA binding ; GO:0030623 | translation elongation factor activity ; GO:0003746 | GTPase activity ; GO:0003924
				FBgn0000557	eukaryotic translation elongation factor 1 alpha 2	eEF1alpha2	translational elongation ; GO:0006414 | translation ; GO:0006412	GTP binding ; GO:0005525 | GTPase activity ; GO:0003924 | translation elongation factor activity ; GO:0003746
				FBgn0024556	mitochondrial translation elongation factor Tu 1	mEFTu1	translational elongation ; GO:0006414 | mitochondrial translational elongation ; GO:0070125	GTP binding ; GO:0005525 | GTPase activity ; GO:0003924 | translation elongation factor activity ; GO:0003746
				FBgn0029176	eukaryotic translation elongation factor 1 gamma	eEF1gamma	translational elongation ; GO:0006414	translation elongation factor activity ; GO:0003746
				FBgn0028737	eukaryotic translation elongation factor 1 beta	eEF1beta	translational elongation ; GO:0006414	translation elongation factor activity ; GO:0003746 | guanyl-nucleotide exchange factor activity ; GO:0005085
				FBgn0050185	aaRS-interacting multifunctional protein 3	AIMP3	-	-
		GO:0007041	lysosomal transport. The directed movement of substances into, out of or within a lysosome.	FBgn0000482	deep orange	dor	border follicle cell migration ; GO:0007298 | endosome organization ; GO:0007032 | determination of adult lifespan ; GO:0008340 | endosome to lysosome transport ; GO:0008333 | early endosome to late endosome transport ; GO:0045022 | cell division ; GO:0051301 | pteridine biosynthetic process ; GO:0006728 | autophagosome maturation ; GO:0097352 | endosome to lysosome transport ; GO:0008333 | lysos…	protein binding ; GO:0005515 | zinc ion binding ; GO:0008270 | protein binding ; GO:0005515 | protein binding, bridging ; GO:0030674 |syntaxin binding ; GO:0019905
				FBgn0029737	-	CG6903	lysosomal transport ; GO:0007041	transferase activity, transferring acyl groups ; GO:0016746
				FBgn0031710	Vacuolar protein sorting 52	Vps52	endocytic recycling ; GO:0032456 | retrograde transport, endosome to Golgi ; GO:0042147 | lysosomal transport ; GO:0007041 | Golgi to vacuole transport ; GO:0006896	Rab GTPase binding ; GO:0017137 | syntaxin binding ; GO:0019905 | Rab GTPase binding ; GO:0017137
				FBgn0051072	lysosomal enzyme receptor protein	Lerp	positive regulation of autophagy ; GO:0010508 | post-Golgi vesicle-mediated transport ; GO:0006892 | lysosomal transport ; GO:0007041 | inferred from direct assay	signaling receptor activity ; GO:0038023 | protein binding ; GO:0005515 | phosphoprotein binding ; GO:0051219
				FBgn0001087	garnet	g	compound eye pigmentation ; GO:0048072 | eye pigment biosynthetic process ; GO:0006726 | synaptic vesicle membrane organization ; GO:0048499 | intracellular protein transport ; GO:0006886 | ocellus pigment biosynthetic process ; GO:0008055 | endocytosis ; GO:0006897 | exocytosis ; GO:0006887 | Golgi to endosome transport ; GO:0006895 | eye pigment granule organization ; GO:0008057 |Golgi to vacuo…	cargo adaptor activity ; GO:0140312
				FBgn0052350	Vacuolar protein sorting 11	Vps11	regulation of SNARE complex assembly ; GO:0035542 | autophagosome maturation ; GO:0097352 | cellular response to starvation ; GO:0009267 | vacuole organization ; GO:0007033 | endosomal vesicle fusion ; GO:0034058 | vesicle docking involved in exocytosis ; GO:0006904 | lysosomal transport ; GO:0007041 | endosomal transport ; GO:0016197 | endosome organization ; GO:0007032 | histone ubiquitination …	zinc ion binding ; GO:0008270 | ubiquitin-protein transferase activity ; GO:0004842 | protein binding, bridging ; GO:0030674
				FBgn0002566	light	lt	autophagosome maturation ; GO:0097352 | endocytosis ; GO:0006897 | lysosomal transport ; GO:0007041 | protein targeting to vacuole ; GO:0006623 | ommochrome biosynthetic process ; GO:0006727 | Notch receptor processing ; GO:0007220 | dsRNA transport ; GO:0033227 | cellular response to starvation ; GO:0009267 | intracellular transport ; GO:0046907 | regulation of SNARE complex assembly ; GO:003554…	zinc ion binding ; GO:0008270
	Males	GO:0030713	ovarian follicle cell stalk formation. Development of ovarian follicle cells to create the interfollicular stalks that connect the egg chambers of progressive developmental stages. An example of this process is found in Drosophila melanogaster.	FBgn0004861	polyhomeotic proximal	ph-p	negative regulation of transcription, DNA-templated ; GO:0045892 | gene silencing ; GO:0016458 | response to ecdysone ; GO:0035075 | ovarian follicle cell stalk formation ; GO:0030713 | mitotic sister chromatid segregation ; GO:0000070 | central nervous system neuron development ; GO:0021954 | germarium-derived female germ-line cyst encapsulation ; GO:0030708 | syncytial blastoderm mitotic cell c…	zinc ion binding ; GO:0008270 | sequence-specific DNA binding ; GO:0043565 | protein binding ; GO:0005515 | chromatin binding ; GO:0003682 | chaperone binding ; GO:0051087 | DNA topoisomerase binding ; GO:0044547 | DNA binding ; GO:0003677
				FBgn0000928	female sterile (1) Yb	fs(1)Yb	oogenesis ; GO:0048477 | germ-line stem cell population maintenance ; GO:0030718 | germ-line stem cell division ; GO:0042078 | negative regulation of transposition, RNA-mediated ; GO:0010526 | germ cell development ; GO:0007281	-
				FBgn0004647	Notch	N	cell fate specification ; GO:0001708 | Notch signaling pathway ; GO:0007219 |ovarian follicle cell stalk formation ; GO:0030713 | negative regulation of neurogenesis ; GO:0050768 | glial cell differentiation ; GO:0010001 | compound eye morphogenesis ; GO:0001745 | dorsal closure ; GO:0007391 | border follicle cell migration ; GO:0007298 | positive regulation of neuroblast proliferation ; GO:00020…	calcium ion binding ; GO:0005509 | protein binding ; GO:0005515 | transmembrane signaling receptor activity ; GO:0004888 | chromatin binding ; GO:0003682
				FBgn0029881	pickled eggs	pigs	ovarian follicle cell stalk formation ; GO:0030713 | ovarian follicle cell development ; GO:0030707	microtubule binding ; GO:0008017
				FBgn0004864	hopscotch	hop	positive regulation of heterochromatin assembly ; GO:0031453 | open tracheal system development ; GO:0007424 | larval lymph gland hemopoiesis ; GO:0035167 | receptor signaling pathway via JAK-STAT ; GO:0007259 | defense response to virus ; GO:0051607 | leg disc morphogenesis ; GO:0007478 | tyrosine phosphorylation of STAT protein ; GO:0007260 | establishment of ommatidial planar polarity ; GO:004…	ATP binding ; GO:0005524 | cytokine receptor binding ; GO:0005126 | protein tyrosine kinase activity ; GO:0004713
				FBgn0031951	r2d2	r2d2	siRNA loading onto RISC involved in RNA interference ; GO:0035087 | regulation of production of small RNA involved in gene silencing by RNA ; GO:0070920 | heterochromatin organization involved in chromatin silencing ; GO:0070868 | defense response to virus ; GO:0051607 | ovarian follicle cell stalk formation ; GO:0030713 | production of siRNA involved in RNA interference ; GO:0030422 | production…	double-stranded RNA binding ; GO:0003725
				FBgn0022027	Vacuolar protein sorting 25	Vps25	ubiquitin-dependent protein catabolic process via the multivesicular body sorting pathway ; GO:0043162 |imaginal disc-derived male genitalia morphogenesis ; GO:0048803 | negative regulation of epithelial cell proliferation ; GO:0050680 | regulation of apoptotic process ; GO:0042981 | ubiquitin-dependent endocytosis ; GO:0070086 | maintenance of epithelial cell apical/basal polarity ; GO:0045199 |…	structural molecule activity ; GO:0005198 | protein homodimerization activity ; GO:0042803 |
				FBgn0034744	Vacuolar protein sorting 20	Vps20	vacuolar transport ; GO:0007034 | endosome transport via multivesicular body sorting pathway ; GO:0032509 | ubiquitin-dependent protein catabolic process via the multivesicular body sorting pathway ; GO:0043162
				FBgn0086408	stall	stl	proteolysis ; GO:0006508 | ovarian follicle cell stalk formation ; GO:0030713 | negative regulation of neuron migration ; GO:2001223 | ovarian follicle development ; GO:0001541 | oogenesis ; GO:0048477	metalloendopeptidase activity ; GO:0004222 | zinc ion binding ; GO:0008270
				FBgn0004636	Rap1 GTPase	Rap1	positive regulation of ERK1 and ERK2 cascade ; GO:0070374 | R7 cell fate commitment ; GO:0007465 | Rap protein signal transduction ; GO:0032486 | cellular response to cAMP ; GO:0071320 | positive regulation of sevenless signaling pathway ; GO:0045874 | dorsal closure ; GO:0007391 |adherens junction assembly ; GO:0034333 | germ-line stem cell population maintenance ; GO:0030718 | positive regulati…	protein binding ; GO:0005515 | GTPase activity ; GO:0003924 | GDP binding ; GO:0019003 | GTP binding ; GO:0005525
				FBgn0262716	Actin-related protein 3	Arp3	myoblast fusion ; GO:0007520 | actin cytoskeleton organization ; GO:0030036 | pseudocleavage involved in syncytial blastoderm formation ; GO:0030589 | chaeta development ; GO:0022416 | plasma membrane tubulation ; GO:0097320 | positive regulation of synaptic growth at neuromuscular junction ; GO:0045887 | intracellular protein transport ; GO:0006886 | positive regulation of lamellipodium assembly…	ATP binding ; GO:0005524 | actin filament binding ; GO:0051015 |structural constituent of cytoskeleton ; GO:0005200
				FBgn0036740	Vacuolar protein sorting 60	Vps60	vacuolar transport ; GO:0007034 | endosome transport via multivesicular body sorting pathway ; GO:0032509
				FBgn0003334	Sex comb on midleg	Scm	regulation of transcription, DNA-templated ; GO:0006355 | gene silencing ; GO:0016458 | axonogenesis ; GO:0007409 | germarium-derived female germ-line cyst encapsulation ; GO:0030708 | negative regulation of growth ; GO:0045926 | compound eye development ; GO:0048749 | neurogenesis ; GO:0022008 | ovarian follicle cell stalk formation ; GO:0030713 | negative regulation of transcription, DNA-templa…	zinc ion binding ; GO:0008270 | identical protein binding ; GO:0042802 | protein binding ; GO:0005515 | PRC1 complex binding ; GO:0140259
				FBgn0261285	Phosphopantothenoylcysteine synthetase	Ppcs	dorsal appendage formation ; GO:0046843 | actin cytoskeleton organization ; GO:0030036 | imaginal disc-derived wing morphogenesis ; GO:0007476 | coenzyme A biosynthetic process ; GO:0015937 | phospholipid homeostasis ; GO:0055091 | cytoplasmic transport, nurse cell to oocyte ; GO:0007303 | chaeta development ; GO:0022416 | ovarian follicle cell stalk formation ; GO:0030713 | germarium-derived fem…	phosphopantothenate--cysteine ligase activity ; GO:0004632
				FBgn0000463	Delta	Dl	apposition of dorsal and ventral imaginal disc-derived wing surfaces ; GO:0007475 | sensory organ development ; GO:0007423 | second mitotic wave involved in compound eye morphogenesis ; GO:0016330 | oogenesis ; GO:0048477 | mesoderm development ; GO:0007498 | antennal morphogenesis ; GO:0048800 | stem cell differentiation ; GO:0048863 | imaginal disc-derived wing margin morphogenesis ; GO:0008587…	calcium ion binding ; GO:0005509 | Notch binding ; GO:0005112 | receptor ligand activity ; GO:0048018 | protein binding ; GO:0005515 | glycosphingolipid binding ; GO:0043208
				FBgn0016917	Signal-transducer and activator of transcription protein at 92E	Stat92E	regulation of cell population proliferation ; GO:0042127 | eye-antennal disc morphogenesis ; GO:0007455 | stem cell division ; GO:0017145 | lymph gland development ; GO:0048542 | negative regulation of antimicrobial humoral response ; GO:0008348 | oogenesis ; GO:0048477 | positive regulation of defense response to virus by host ; GO:0002230 | blastoderm segmentation ; GO:0007350 | receptor signal…	DNA-binding transcription activator activity, RNA polymerase II-specific ; GO:0001228 | RNA polymerase II proximal promoter sequence-specific DNA binding ; GO:0000978 | protein binding ; GO:0005515 | DNA-binding transcription activator activity, RNA polymerase II-specific ; GO:0001228 | cytokine receptor binding ; GO:0005126 | histone binding ; GO:0042393 | DNA binding ; GO:0003677 |
				FBgn0004644	hedgehog	hh	intein-mediated protein splicing ; GO:0016539 | foregut morphogenesis ; GO:0007440 | wing disc pattern formation ; GO:0035222 | smoothened signaling pathway ; GO:0007224 | compound eye morphogenesis ; GO:0001745 | protein autoprocessing ; GO:0016540 | negative regulation of proteolysis ; GO:0045861 | germ cell migration ; GO:0008354 | heart development ; GO:0007507 | segment polarity determinatio…	peptidase activity ; GO:0008233 | patched binding ; GO:0005113 | calcium ion binding ; GO:0005509 |protein binding ; GO:0005515 | morphogen activity ; GO:0016015
				FBgn0003330	Sex combs extra	Sce	chromatin silencing ; GO:0006342 | ovarian follicle cell stalk formation ; GO:0030713 | neurogenesis ; GO:0022008 | germarium-derived female germ-line cyst encapsulation ; GO:0030708 | histone H2A monoubiquitination ; GO:0035518 | sex comb development ; GO:0045498 | multicellular organism development ; GO:0007275 | i ventral cord development ; GO:0007419	ubiquitin protein ligase activity ; GO:0061630 | chromatin binding ; GO:0003682 | ubiquitin-protein transferase activity ; GO:0004842 | protein binding ; GO:0005515 | zinc ion binding ; GO:0008270
				FBgn0004198	cut	ct	female gonad development ; GO:0008585 | Golgi vesicle transport ; GO:0048193 | negative regulation of transcription by RNA polymerase II ; GO:0000122 | dendrite guidance ; GO:0070983 | antennal development ; GO:0007469 | dendrite morphogenesis ; GO:0048813 | spiracle morphogenesis, open tracheal system ; GO:0035277 | open tracheal system development ; GO:0007424 | Malpighian tubule morphogenesis …	RNA polymerase II regulatory region sequence-specific DNA binding ; GO:0000977 | transcription regulatory region sequence-specific DNA binding ; GO:0000976 DNA binding ; GO:0003677
				FBgn0021814	Vacuolar protein sorting 28	Vps28	autophagosome maturation ; GO:0097352 | endosome transport via multivesicular body sorting pathway ; GO:0032509 | actin cytoskeleton organization ; GO:0030036 | compound eye development ; GO:0048749 | autophagy ; GO:0006914 | embryo development ending in birth or egg hatching ; GO:0009792 | protein transport to vacuole involved in ubiquitin-dependent protein catabolic process via the multivesicul…	protein-containing complex binding ; GO:0044877 | protein binding ; GO:0005515
		GO:0006020	inositol metabolic process | inositol metabolism | myo-inositol metabolic process | myo-inositol metabolism | vitamin Bh metabolic process | vitamin Bh metabolism. The chemical reactions and pathways involving inositol, 1,2,3,4,5,6-cyclohexanehexol, a growth factor for animals and microorganisms.	FBgn0027279	lethal (1) G0196	l(1)G0196	inositol phosphate biosynthetic process ; GO:0032958 | inositol metabolic process ; GO:0006020 |	diphosphoinositol-pentakisphosphate kinase activity ; GO:0033857 | inositol-1,3,4,5,6-pentakisphosphate kinase activity ; GO:0000827 | ATP binding ; GO:0005524 | inositol hexakisphosphate 5-kinase activity ; GO:0000832 | inositol heptakisphosphate kinase activity ; GO:0000829 | inositol hexakisphosphate kinase activity ; GO:0000828
				FBgn0036550	-	CG17026	phosphatidylinositol phosphorylation ; GO:0046854 | inositol phosphate dephosphorylation ; GO:0046855 | inositol metabolic process ; GO:0006020 | signal transduction ; GO:0007165	inositol monophosphate 1-phosphatase activity ; GO:0008934
				FBgn0036551	-	CG17029	phosphatidylinositol phosphorylation ; GO:0046854 | signal transduction ; GO:0007165 | inositol phosphate dephosphorylation ; GO:0046855 | inositol metabolic process ; GO:0006020	inositol monophosphate 1-phosphatase activity ; GO:0008934
				FBgn0036552	-	CG17028	phosphatidylinositol phosphorylation ; GO:0046854 | inositol phosphate dephosphorylation ; GO:0046855 | signal transduction ; GO:0007165 | inositol metabolic process ; GO:0006020	inositol monophosphate 1-phosphatase activity ; GO:0008934
				FBgn0036553	-	CG17027	phosphatidylinositol phosphorylation ; GO:0046854 | signal transduction ; GO:0007165 | inositol phosphate dephosphorylation ; GO:0046855 | inositol metabolic process ; GO:0006020	inositol monophosphate 1-phosphatase activity ; GO:0008934
				FBgn0037063	-	CG9391	phosphatidylinositol phosphorylation ; GO:0046854 | inositol metabolic process ; GO:0006020 | inositol phosphate dephosphorylation ; GO:0046855 | signal transduction ; GO:0007165	inositol monophosphate 1-phosphatase activity ; GO:0008934
				FBgn0037064	-	CG9389	phosphatidylinositol phosphorylation ; GO:0046854 | inositol metabolic process ; GO:0006020 | signal transduction ; GO:0007165 | inositol phosphate dephosphorylation ; GO:0046855	inositol monophosphate 1-phosphatase activity ; GO:0008934
Startle Response	Females and Males	GO:0005741	mitochondrial outer membrane | outer mitochondrial membrane. The outer, i.e. cytoplasm-facing, lipid bilayer of the mitochondrial envelope.	FBgn0029661	-	CG16781	protein polyubiquitination ; GO:0000209	zinc ion binding ; GO:0008270 | ubiquitin-protein transferase activity ; GO:0004842
				FBgn0263987	spoonbill	spoon	regulation of protein kinase A signaling ; GO:0010738 | maternal determination of dorsal/ventral axis, ovarian follicular epithelium, germ-line encoded ; GO:0008070 | dorsal appendage formation ; GO:0046843 | long-term memory ; GO:0007616 | dorsal/ventral axis specification, ovarian follicular epithelium ; GO:0008069 | thermosensory behavior ; GO:0040040 | chromosome organization ; GO:0051276 | c…	protein kinase A regulatory subunit binding ; GO:0034237 | RNA binding ; GO:0003723
				FBgn0030015	-	CG10761	protein polyubiquitination ; GO:0000209	zinc ion binding ; GO:0008270 | ubiquitin-protein transferase activity ; GO:0004842
				FBgn0030620	-	CG5662	protein targeting to mitochondrion ; GO:0006626	-
				FBgn0031263	Translocator protein	Tspo	regulation of oxidative phosphorylation ; GO:0002082 | positive regulation of apoptotic process ; GO:0043065 | determination of adult lifespan ; GO:0008340	-
				FBgn0260454	-	CG17139	anion transmembrane transport ; GO:0098656	channel activity ; GO:0015267 | voltage-gated anion channel activity ; GO:0008308
				FBgn0069354	Porin2	Porin2	anion transmembrane transport ; GO:0098656 | ion transport ; GO:0006811 | mitochondrial transport ; GO:0006839	porin activity ; GO:0015288 | voltage-gated anion channel activity ; GO:0008308 | cation channel activity ; GO:0005261 |
				FBgn0004363	porin	porin	anion transmembrane transport ; GO:0098656 | ion transport ; GO:0006811 | mitochondrial transport ; GO:0006839 | sperm mitochondrion organization ; GO:0030382 | mitochondrion organization ; GO:0007005 | sperm individualization ; GO:0007291 phototransduction ; GO:0007602	voltage-gated anion channel activity ; GO:0008308
				FBgn0028868	-	CG4701	-	ATP binding ; GO:0005524
				FBgn0000337	cinnabar	cn	quinolinate biosynthetic process ; GO:0019805 | tryptophan catabolic process ; GO:0006569 | ommochrome biosynthetic process ; GO:0006727 | positive regulation of neuron death ; GO:1901216 | NAD metabolic process ; GO:0019674 | kynurenine metabolic process ; GO:0070189 | compound eye pigmentation ; GO:0048072	FAD binding ; GO:0071949 | flavin adenine dinucleotide binding ; GO:0050660 | kynurenine 3-monooxygenase activity ; GO:0004502 | NAD(P)H oxidase activity ; GO:0016174
				FBgn0040491	Buffy	Buffy	regulation of apoptotic process ; GO:0042981 | positive regulation of macroautophagy ; GO:0016239 | extrinsic apoptotic signaling pathway in absence of ligand ; GO:0097192 | cellular response to starvation ; GO:0009267 | programmed cell death ; GO:0012501 | traceable author statement <newline> ectopic germ cell programmed cell death ; GO:0035234 | positive regulation of programmed cell death ; GO…	protein homodimerization activity ; GO:0042803 | protein heterodimerization activity ; GO:0046982
				FBgn0260960	Baldspot	Baldspot	fatty acid elongation, saturated fatty acid ; GO:0019367 | long-chain fatty acid biosynthetic process ; GO:0042759 | very long-chain fatty acid biosynthetic process ; GO:0042761 | fatty acid elongation, polyunsaturated fatty acid ; GO:0034626 | sphingolipid biosynthetic process ; GO:0030148 | fatty acid elongation, monounsaturated fatty acid ; GO:0034625 | fatty acid elongation ; GO:0030497 | spe…	fatty acid elongase activity ; GO:0009922
				FBgn0011706	reaper	rpr	apoptotic signaling pathway ; GO:0097190 | larval midgut cell programmed cell death ; GO:0035096 | apoptotic process ; GO:0006915 | positive regulation of cysteine-type endopeptidase activity ; GO:2001056 | intrinsic apoptotic signaling pathway in response to osmotic stress ; GO:0008627 | programmed cell death ; GO:0012501 | larval central nervous system remodeling ; GO:0035193 | apoptotic proces…	protein homodimerization activity ; GO:0042803 | ubiquitin conjugating enzyme binding ; GO:0031624 |ubiquitin protein ligase binding ; GO:0031625 | phospholipid binding ; GO:0005543
				FBgn0036920	-	CG8004	protein targeting to mitochondrion ; GO:0006626	-
				FBgn0037007	-	CG5059	positive regulation of apoptotic process ; GO:0043065 | regulation of programmed cell death ; GO:0043067 | mitochondrial outer membrane permeabilization ; GO:0097345	-
				FBgn0037242	-	CG9855	protein polyubiquitination ; GO:0000209	zinc ion binding ; GO:0008270 | ubiquitin-protein transferase activity ; GO:0004842
				FBgn0037710	-	CG9393	protein targeting to mitochondrion ; GO:0006626	-
				FBgn0039463	Spag1 axonemal dynein assembly factor	Spag1	protein targeting to mitochondrion ; GO:0006626	heat shock protein binding ; GO:0031072
				FBgn0039498	-	CG17991	protein polyubiquitination ; GO:0000209	zinc ion binding ; GO:0008270 | ubiquitin-protein transferase activity ; GO:0004842
				FBgn0027579	minotaur	mino	plasma membrane organization ; GO:0007009 | fatty acid metabolic process ; GO:0006631 | triglyceride biosynthetic process ; GO:0019432 | phospholipid biosynthetic process ; GO:0008654 | glycerol-3-phosphate metabolic process ; GO:0006072 | phospholipid biosynthetic process ; GO:0008654 | piRNA metabolic process ; GO:0034587	glycerol-3-phosphate O-acyltransferase activity ; GO:0004366
				FBgn0039749	-	CG11498	mitophagy by induced vacuole formation ; GO:0035695 |mitochondrial protein catabolic process ; GO:0035694	-
				FBgn0005322	no mitochondrial derivative	nmd	wing disc dorsal/ventral pattern formation ; GO:0048190 | spermatid development ; GO:0007286	ATP binding ; GO:0005524
				FBgn0025814	Microsomal glutathione S-transferase-like	Mgstl	oxidation-reduction process ; GO:0055114 | prostaglandin biosynthetic process ; GO:0001516	glutathione peroxidase activity ; GO:0004602 | prostaglandin-E synthase activity ; GO:0050220 | glutathione transferase activity ; GO:0004364
				FBgn0029131	Death executioner Bcl-2	Debcl	positive regulation of macroautophagy ; GO:0016239 | apoptotic process ; GO:0006915 |autophagy ; GO:0006914 | cellular response to starvation ; GO:0009267 | apoptotic process involved in morphogenesis ; GO:0060561 | negative regulation of apoptotic process ; GO:0043066 | negative regulation of neuron apoptotic process ; GO:0043524 | neuron cellular homeostasis ; GO:0070050 | ectopic germ cell pro…	protein heterodimerization activity ; GO:0046982 | protein homodimerization activity ; GO:0042803
				FBgn0260453	-	CG17140	anion transmembrane transport ; GO:0098656	voltage-gated anion channel activity ; GO:0008308 | channel activity ; GO:0015267
		GO:0007088	regulation of mitotic nuclear division | regulation of mitosis. Any process that modulates the frequency, rate or extent of mitosis.	FBgn0011606	Kinesin-like protein at 3A	Klp3A	mitotic cell cycle ; GO:0000278 | meiosis I cytokinesis ; GO:0007110 | chromosome segregation ; GO:0007059 | reciprocal meiotic recombination ; GO:0007131 | female meiosis chromosome segregation ; GO:0016321 | mitotic spindle organization ; GO:0007052 | microtubule-based movement ; GO:0007018 | regulation of mitotic nuclear division ; GO:0007088 | single fertilization ; GO:0007338 | spindle elong…	ATP binding ; GO:0005524 | microtubule binding ; GO:0008017 | microtubule motor activity ; GO:0003777 | ATPase activity ; GO:0016887 | ATP-dependent microtubule motor activity, plus-end-directed ; GO:0008574
				FBgn0026085	dim gamma-tubulin 4	dgt4	mitotic spindle organization ; GO:0007052	-
				FBgn0029970	Nek2	Nek2	positive regulation of canonical Wnt signaling pathway ; GO:0090263 | protein phosphorylation ; GO:0006468 | compound eye photoreceptor cell differentiation ; GO:0001751 | regulation of mitotic nuclear division ; GO:0007088 | positive regulation of canonical Wnt signaling pathway ; GO:0090263 | chromosome segregation ; GO:0007059	ATP binding ; GO:0005524 | protein serine/threonine kinase activity ; GO:0004674
				FBgn0002914	Myb oncogene-like	Myb	positive regulation of transcription, DNA-templated ; GO:0045893 | mitotic cell cycle ; GO:0000278 | spindle organization ; GO:0007051 | positive regulation of G2/M transition of mitotic cell cycle ; GO:0010971 | centrosome cycle ; GO:0007098 | positive regulation of cell population proliferation ; GO:0008284 | chromosome condensation ; GO:0030261 | negative regulation of cell size ; GO:0045792 |…	DNA-binding transcription factor activity ; GO:0003700 | DNA-binding transcription activator activity, RNA polymerase II-specific ; GO:0001228
				FBgn0004367	meiotic 41	mei-41	telomere maintenance ; GO:0000723 | double-strand break repair via single-strand annealing ; GO:0045002 | response to radiation ; GO:0009314 | imaginal disc development ; GO:0007444 | peptidyl-serine phosphorylation ; GO:0018105 | regulation of mitotic nuclear division ; GO:0007088 | cellularization ; GO:0007349 | double-strand break repair via synthesis-dependent strand annealing ; GO:0045003 | …	protein serine/threonine kinase activity ; GO:0004674
				FBgn0017551	Regulator of cyclin A1	Rca1	eye-antennal disc morphogenesis ; GO:0007455 | G1/S transition of mitotic cell cycle ; GO:0000082 | regulation of mitotic nuclear division ; GO:0007088 | regulation of mitotic nuclear division ; GO:0007088 | SCF-dependent proteasomal ubiquitin-dependent protein catabolic process ; GO:0031146 | negative regulation of ubiquitin protein ligase activity ; GO:1904667 | negative regulation of meiotic n…	ubiquitin-protein transferase activity ; GO:0004842
				FBgn0033740	dim gamma-tubulin 5	dgt5	regulation of mitotic nuclear division ; GO:0007088 | mitotic spindle organization ; GO:0007052	-
				FBgn0034569	dim gamma-tubulin 3	dgt3	regulation of mitotic nuclear division ; GO:0007088 | mitotic spindle organization ; GO:0007052	-
				FBgn0261850	Xeroderma pigmentosum D	Xpd	negative regulation of G2/M transition of mitotic cell cycle ; GO:0010972 | transcription by RNA polymerase II ; GO:0006366 | response to UV ; GO:0009411 | transcriptional open complex formation at RNA polymerase II promoter ; GO:0001113 | regulation of syncytial blastoderm mitotic cell cycle ; GO:0007348 | positive regulation of transcription, DNA-templated ; GO:0045893 | regulation of mitotic r…	ATP binding ; GO:0005524 | damaged DNA binding ; GO:0003684 | DNA helicase activity ; GO:0003678 | RNA polymerase II CTD heptapeptide repeat kinase activity ; GO:0008353 | 5'-3' DNA helicase activity ; GO:0043139
				FBgn0035407	ASCIZ zinc finger protein	Asciz	positive regulation of transcription by RNA polymerase II ; GO:0045944 | regulation of mitotic nuclear division ; GO:0007088 | metamorphosis ; GO:0007552	nucleic acid binding ; GO:0003676
				FBgn0041171	archipelago	ago	cellular response to hypoxia ; GO:0071456 | regulation of autophagy of mitochondrion ; GO:1903146 | negative regulation of cellular response to hypoxia ; GO:1900038 | negative regulation of growth ; GO:0045926 | ventral cord development ; GO:0007419 |axon guidance ; GO:0007411 | DNA endoreduplication ; GO:0042023 | negative regulation of imaginal disc growth ; GO:0045571 |branch fusion, open trac…	cyclin binding ; GO:0030332 | ubiquitin-protein transferase activity ; GO:0004842 |ubiquitin-specific protease binding ; GO:1990381 | iprotein binding ; GO:0005515
				FBgn0000404	Cyclin A	CycA	mitotic cell cycle ; GO:0000278 | regulation of mitotic nuclear division ; GO:0007088 | regulation of cyclin-dependent protein serine/threonine kinase activity ; GO:0000079 | asymmetric neuroblast division ; GO:0055059 | mitotic cell cycle phase transition ; GO:0044772 | regulation of chromatin binding ; GO:0035561 | regulation of exit from mitosis ; GO:0007096 | positive regulation of cell cycle…	protein kinase activity ; GO:0004672 | protein binding ; GO:0005515 | protein kinase binding ; GO:0019901 | cyclin-dependent protein serine/threonine kinase regulator activity ; GO:0016538
				FBgn0061515	endosulfine	endos	water homeostasis ; GO:0030104 | negative regulation of protein dephosphorylation ; GO:0035308 | regulation of meiotic cell cycle ; GO:0051445 | negative regulation of phosphoprotein phosphatase activity ; GO:0032515 | regulation of mitotic nuclear division ; GO:0007088 | response to nutrient ; GO:0007584 | oogenesis ; GO:0048477 | negative regulation of protein dephosphorylation ; GO:0035308 | m…	protein phosphatase inhibitor activity ; GO:0004864
				FBgn0001323	knirps-like	knrl	regulation of mitotic nuclear division ; GO:0007088 | negative regulation of transcription, DNA-templated ; GO:0045892 | epithelial cell migration, open tracheal system ; GO:0007427	zinc ion binding ; GO:0008270 | sequence-specific DNA binding ; GO:0043565 | DNA-binding transcription factor activity ; GO:0003700 | repressing transcription factor binding ; GO:0070491
				FBgn0001320	knirps	kni	negative regulation of transcription by RNA polymerase II ; GO:0000122 | negative regulation of transcription, DNA-templated ; GO:0045892 | regulation of transcription, DNA-templated ; GO:0006355 | zygotic determination of anterior/posterior axis, embryo ; GO:0007354 | trunk segmentation ; GO:0035290 | zygotic determination of anterior/posterior axis, embryo ; GO:0007354 | epithelial cell migrati…	zinc ion binding ; GO:0008270 | sequence-specific DNA binding ; GO:0043565 | DNA-binding transcription repressor activity, RNA polymerase II-specific ; GO:0001227 | repressing transcription factor binding ; GO:0070491 | protein binding ; GO:0005515 | DNA-binding transcription factor activity ; GO:0003700
				FBgn0020238	14-3-3epsilon	14-3-3epsilon	mitotic cell cycle checkpoint ; GO:0007093 | pole cell migration ; GO:0007280 | determination of adult lifespan ; GO:0008340 | DNA damage checkpoint ; GO:0000077 | positive regulation of Ras protein signal transduction ; GO:0046579 | DNA damage checkpoint ; GO:0000077 | response to UV ; GO:0009411 | imaginal disc development ; GO:0007444 | positive regulation of hippo signaling ; GO:0035332 | ooc…	protein domain specific binding ; GO:0019904 | phosphoserine residue binding ; GO:0050815 | protein binding ; GO:0005515 | transcription factor binding ; GO:0008134 | protein heterodimerization activity ; GO:0046982
				FBgn0039638	dim gamma-tubulin 6	dgt6	spindle assembly ; GO:0051225 | regulation of mitotic nuclear division ; GO:0007088 | mitotic spindle organization ; GO:0007052	-
				FBgn0261617	nejire	nej	R3/R4 cell fate commitment ; GO:0007464 | negative regulation of canonical Wnt signaling pathway ; GO:0090090 | thermosensory behavior ; GO:0040040 | regulation of mitotic nuclear division ; GO:0007088 | positive regulation of canonical Wnt signaling pathway ; GO:0090263 | positive regulation of smoothened signaling pathway ; GO:0045880 | histone H4-K8 acetylation ; GO:0043982 | glial cell migrat…	zinc ion binding ; GO:0008270 | histone acetyltransferase activity ; GO:0004402 |histone acetyltransferase activity (H3-K27 specific) ; GO:0044017 | cAMP response element binding protein binding ; GO:0008140 | transcription coactivator activity ; GO:0003713 | transcription factor binding ; GO:0008134 | histone methyltransferase binding ; GO:1990226 | histone acetyltransferase activity (H3-K18 spe…
				FBgn0262699	fizzy-related	fzr	positive regulation of ubiquitin protein ligase activity ; GO:1904668 | glial cell migration ; GO:0008347 | compound eye morphogenesis ; GO:0001745 | protein catabolic process ; GO:0030163 | positive regulation of exit from mitosis ; GO:0031536 | eye-antennal disc morphogenesis ; GO:0007455 | exit from mitosis ; GO:0010458 | glial cell differentiation ; GO:0010001 | anaphase-promoting complex-dep…	anaphase-promoting complex binding ; GO:0010997 | ubiquitin-protein transferase activator activity ; GO:0097027
				FBgn0260399	greatwall	gwl	mitotic cell cycle ; GO:0000278 | peptidyl-serine phosphorylation ; GO:0018105 | regulation of mitotic centrosome separation ; GO:0046602 | regulation of mitotic nuclear division ; GO:0007088 | regulation of mitotic cell cycle ; GO:0007346 | negative regulation of phosphoprotein phosphatase activity ; GO:0032515 | intracellular signal transduction ; GO:0035556 | chromosome condensation ; GO:00302…	ATP binding ; GO:0005524 | protein serine/threonine kinase activity ; GO:0004674 | protein binding ; GO:0005515 | 14-3-3 protein binding ; GO:0071889
	Females	GO:0010529	negative regulation of transposition. Any process that decreases the frequency, rate or extent of transposition. Transposition results in the movement of discrete segments of DNA between nonhomologous sites.	FBgn0001206	Hybrid male rescue	Hmr	regulation of transposition ; GO:0010528 | mitotic sister chromatid segregation ; GO:0000070 | negative regulation of transposition ; GO:0010529 | telomere maintenance ; GO:0000723	protein binding ; GO:0005515
				FBgn0004872	P-element induced wimpy testis	piwi	pole cell formation ; GO:0007279 |female germ-line stem cell asymmetric division ; GO:0048132 | positive regulation of methylation-dependent chromatin silencing ; GO:0090309 | negative regulation of transposition, DNA-mediated ; GO:0000335 | germ-line stem cell population maintenance ; GO:0030718 | negative regulation of transposition ; GO:0010529 |heterochromatin organization involved in chromat…	RNA binding ; GO:0003723 | protein binding ; GO:0005515 | chromatin DNA binding ; GO:0031490 | piRNA binding ; GO:0034584
				FBgn0000146	aubergine	aub	RNA interference ; GO:0016246 | oocyte karyosome formation ; GO:0030717 | positive regulation of nuclear-transcribed mRNA poly(A) tail shortening ; GO:0060213 | positive regulation of innate immune response ; GO:0045089 | gene silencing by RNA ; GO:0031047 | RNA interference ; GO:0016246 | defense response to Gram-negative bacterium ; GO:0050829 | pole cell formation ; GO:0007279 | regulation of …	RNA binding ; GO:0003723 | piRNA binding ; GO:0034584
				FBgn0033921	tejas	tej	piRNA biosynthetic process ; GO:1990511 | negative regulation of transposition ; GO:0010529 | oocyte karyosome formation ; GO:0030717	-
				FBgn0034217	Lethal hybrid rescue	Lhr	negative regulation of transposition ; GO:0010529 | mitotic sister chromatid segregation ; GO:0000070 | regulation of transposition ; GO:0010528 | telomere maintenance ; GO:0000723 | heterochromatin organization involved in chromatin silencing ; GO:0070868	DNA binding ; GO:0003677 | protein binding ; GO:0005515
				FBgn0027529	tapas	tapas	negative regulation of transposition ; GO:0010529 | piRNA biosynthetic process ; GO:1990511	-
				FBgn0035121	Tudor staphylococcal nuclease	Tudor-SN	gene silencing by RNA ; GO:0031047 | spermatogenesis ; GO:0007283 | negative regulation of transposition ; GO:0010529 | i RNA catabolic process ; GO:0006401	protein binding ; GO:0005515 | RNA binding ; GO:0003723 | nuclease activity ; GO:0004518
				FBgn0001233	Heat shock protein 83	Hsp83	pole plasm mRNA localization ; GO:0019094 | positive regulation of neuroblast proliferation ; GO:0002052 | positive regulation of small RNA loading onto RISC ; GO:0106161 | centrosome cycle ; GO:0007098 | negative regulation of cell population proliferation ; GO:0008285 | response to heat ; GO:0009408 | protein stabilization ; GO:0050821 | positive regulation of insulin receptor signaling pathway…	disordered domain specific binding ; GO:0097718 |unfolded protein binding ; GO:0051082 | ATP binding ; GO:0005524 | insulin receptor binding ; GO:0005158 | TPR domain binding ; GO:0030911
				FBgn0016034	maelstrom	mael	protein localization ; GO:0008104 | oogenesis ; GO:0048477 | piRNA metabolic process ; GO:0034587 | pole plasm mRNA localization ; GO:0019094 | germ-line stem cell population maintenance ; GO:0030718 | oocyte microtubule cytoskeleton organization ; GO:0016325 | oocyte fate commitment ; GO:0048600 | spermatogenesis ; GO:0007283 | oocyte nucleus localization involved in oocyte dorsal/ventral axis s…	transcription regulatory region DNA binding ; GO:0044212 | isequence-specific DNA binding ; GO:0043565
				FBgn0003483	spindle E	spn-E	oocyte localization involved in germarium-derived egg chamber formation ; GO:0030720 | regulation of pole plasm oskar mRNA localization ; GO:0007317 | RNA localization ; GO:0006403 | chromatin silencing ; GO:0006342 | oogenesis ; GO:0048477 | intracellular mRNA localization ; GO:0008298 | germarium-derived oocyte fate determination ; GO:0007294 | oocyte maturation ; GO:0001556 | polarity specific…	ATP binding ; GO:0005524 | helicase activity ; GO:0004386 | RNA binding ; GO:0003723 | RNA-dependent ATPase activity ; GO:0008186 | RNA helicase activity ; GO:0003724
				FBgn0250816	Argonaute 3	AGO3	positive regulation of nuclear-transcribed mRNA poly(A) tail shortening ; GO:0060213 | negative regulation of transposition ; GO:0010529 | posttranscriptional gene silencing by RNA ; GO:0035194	piRNA binding ; GO:0034584 | RNA binding ; GO:0003723
	Males	GO:0007436	larval salivary gland morphogenesis. The process, occurring in the larva, by which the anatomical structures of the salivary gland are generated and organized.	FBgn0030501	BthD selenoprotein	BthD	embryo development ending in birth or egg hatching ; GO:0009792 | determination of adult lifespan ; GO:0008340 | larval salivary gland morphogenesis ; GO:0007436 | anatomical structure development ; GO:0048856 | response to redox state ; GO:0051775 | cell redox homeostasis ; GO:0045454 | salivary gland boundary specification ; GO:0007432	-
				FBgn0000308	chickadee	chic	mitotic cytokinesis ; GO:0000281 | maintenance of protein location in cell ; GO:0032507 | cell morphogenesis ; GO:0000902 | positive regulation of axon regeneration ; GO:0048680 | larval central nervous system remodeling ; GO:0035193 | dorsal closure ; GO:0007391 |axon guidance ; GO:0007411 | actin filament polymerization ; GO:0030041 | positive regulation of axon extension involved in axon guida…	actin monomer binding ; GO:0003785 |protein binding ; GO:0005515
				FBgn0000562	egalitarian	egl	nucleobase-containing compound metabolic process ; GO:0006139 | oocyte nucleus migration involved in oocyte dorsal/ventral axis specification ; GO:0007312 | intracellular mRNA localization ; GO:0008298 | regulation of oskar mRNA translation ; GO:0046011 | pole plasm oskar mRNA localization ; GO:0045451 | oogenesis ; GO:0048477 | larval salivary gland morphogenesis ; GO:0007436 | intracellular mRN…	3'-5' exonuclease activity ; GO:0008408 | mRNA binding ; GO:0003729
				FBgn0004635	rhomboid	rho	epidermal growth factor receptor ligand maturation ; GO:0038004 | photoreceptor cell fate determination ; GO:0043703 | peptide bond cleavage involved in epidermal growth factor receptor ligand maturation ; GO:0038005 | compound eye photoreceptor fate commitment ; GO:0001752 | positive regulation of phosphorylation ; GO:0042327 | imaginal disc-derived wing morphogenesis ; GO:0007476 | cell-cell ad…	serine-type endopeptidase activity ; GO:0004252
				FBgn0010452	tartan	trn	cell adhesion ; GO:0007155 | motor neuron axon guidance ; GO:0008045 | cell migration ; GO:0016477 | larval salivary gland morphogenesis ; GO:0007436 | branch fusion, open tracheal system ; GO:0035147	-
				FBgn0023095	capricious	caps	motor neuron axon guidance ; GO:0008045 | cell adhesion ; GO:0007155 | axon guidance ; GO:0007411 | larval salivary gland morphogenesis ; GO:0007436 | branch fusion, open tracheal system ; GO:0035147 | homophilic cell adhesion via plasma membrane adhesion molecules ; GO:0007156 | cell migration ; GO:0016477 | synapse assembly ; GO:0007416 | photoreceptor cell axon guidance ; GO:0072499	-
				FBgn0038341
				FBgn0015279	Phosphatidylinositol 3-kinase 92E	Pi3K92E	autophagy ; GO:0006914 | positive regulation of imaginal disc growth ; GO:0045572 | positive regulation of lipid storage ; GO:0010884 | negative regulation of feeding behavior ; GO:2000252 | regulation of dendrite development ; GO:0050773 | regulation of multicellular organism growth ; GO:0040014 | phosphatidylinositol 3-kinase signaling ; GO:0014065 | oogenesis ; GO:0048477 | cellular response t…	1-phosphatidylinositol-4-phosphate 3-kinase activity ; GO:0035005 | 1-phosphatidylinositol-3-kinase activity ; GO:0016303 | phosphatidylinositol-4,5-bisphosphate 3-kinase activity ; GO:0046934 | phosphatidylinositol 3-kinase activity ; GO:0035004 | phosphatidylinositol kinase activity ; GO:0052742
				FBgn0004197	Serrate	Ser	glial cell proliferation ; GO:0014009 | larval salivary gland morphogenesis ; GO:0007436 | Notch signaling pathway ; GO:0007219 | crystal cell differentiation ; GO:0042688 | imaginal disc-derived leg segmentation ; GO:0036011 | imaginal disc-derived wing morphogenesis ; GO:0007476 | second mitotic wave involved in compound eye morphogenesis ; GO:0016330 | negative regulation of lamellocyte differ…	calcium ion binding ; GO:0005509 | glycosphingolipid binding ; GO:0043208 | protein binding ; GO:0005515 | Notch binding ; GO:0005112 | receptor ligand activity ; GO:0048018
				FBgn0028968	Coat Protein (coatomer) gamma	gammaCOP	intracellular protein transport ; GO:0006886 | inferred from electronic annotation with InterPro:IPR002553, InterPro:IPR009028, InterPro:IPR013040, InterPro:IPR015873 <newline> protein secretion ; GO:0009306 | inferred from mutant phenotype <newline> chitin-based embryonic cuticle biosynthetic process ; GO:0008362 | inferred from mutant phenotype <newline> open tracheal system development ; GO:00…	structural molecule activity ; GO:0005198 | inferred from electronic annotation with InterPro:IPR013040
				FBgn0026379	Phosphatase and tensin homolog	Pten	phosphatidylinositol dephosphorylation ; GO:0046856 | negative regulation of phosphatidylinositol 3-kinase signaling ; GO:0014067 | regulation of cell junction assembly ; GO:1901888 | lipid homeostasis ; GO:0055088 | larval midgut histolysis ; GO:0035069 | negative regulation of multicellular organism growth ; GO:0040015 | negative regulation of insulin receptor signaling pathway ; GO:0046627 | r…	protein tyrosine/serine/threonine phosphatase activity ; GO:0008138 | protein tyrosine phosphatase activity ; GO:0004725 | phosphatidylinositol-3,4,5-trisphosphate 3-phosphatase activity ; GO:0016314 | inositol-1,3,4,5-tetrakisphosphate 3-phosphatase activity ; GO:0051717 | phosphoprotein phosphatase activity ; GO:0004721 | protein serine/threonine phosphatase activity ; GO:0004722 | PDZ domain b…
				FBgn0028969	Coat Protein (coatomer) delta	deltaCOP	endoplasmic reticulum to Golgi vesicle-mediated transport ; GO:0006888 | retrograde vesicle-mediated transport, Golgi to endoplasmic reticulum ; GO:0006890 | Golgi localization ; GO:0051645 | larval salivary gland morphogenesis ; GO:0007436 | regulation of tube diameter, open tracheal system ; GO:0035158 | regulation of lipid storage ; GO:0010883 | protein secretion ; GO:0009306	-
				FBgn0266756	bitesize	btsz	intracellular protein transport ; GO:0006886 | lumen formation, open tracheal system ; GO:0035149 | cortical actin cytoskeleton organization ; GO:0030866 | gastrulation involving germ band extension ; GO:0010004 | larval salivary gland morphogenesis ; GO:0007436 |actin filament organization ; GO:0007015 | apical junction assembly ; GO:0043297 | exocytosis ; GO:0006887 | positive regulation of mul…	Rab GTPase binding ; GO:0017137 | neurexin family protein binding ; GO:0042043
Starvation Resistance	Females	GO:0030177	positive regulation of Wnt signaling pathway | activation of frizzled signaling pathway | activation of Wnt receptor signaling pathway | positive regulation of frizzled signaling pathway | positive regulation of frizzled signalling pathway | positive regulation of Wnt-activated signaling pathway | positive regulation of Wnt receptor signaling pathway | positive regulation of Wnt receptor signalli…	FBgn0005427	erect wing	ewg	imaginal disc morphogenesis ; GO:0007560 | negative regulation of synaptic growth at neuromuscular junction ; GO:0045886 | central nervous system development ; GO:0007417 | muscle organ development ; GO:0007517 | regulation of transcription by RNA polymerase II ; GO:0006357 | positive regulation of canonical Wnt signaling pathway ; GO:0090263 | adult somatic muscle development ; GO:0007527 | regu…	DNA-binding transcription factor activity ; GO:0003700 | core promoter sequence-specific DNA binding ; GO:0001046 | RNA polymerase II proximal promoter sequence-specific DNA binding ; GO:0000978 | DNA binding ; GO:0003677
				FBgn0029970	Nek2	Nek2	positive regulation of canonical Wnt signaling pathway ; GO:0090263 | protein phosphorylation ; GO:0006468 | compound eye photoreceptor cell differentiation ; GO:0001751 | regulation of mitotic nuclear division ; GO:0007088 | chromosome segregation ; GO:0007059	ATP binding ; GO:0005524 | protein serine/threonine kinase activity ; GO:0004674
				FBgn0027548	spenito	nito	positive regulation of canonical Wnt signaling pathway ; GO:0090263 | positive regulation of gene expression ; GO:0010628 | wing disc pattern formation ; GO:0035222 | negative regulation of stem cell differentiation ; GO:2000737 | mRNA methylation ; GO:0080009 | mRNA splicing, via spliceosome ; GO:0000398 | regulation of alternative mRNA splicing, via spliceosome ; GO:0000381 | compound eye devel…	mRNA binding ; GO:0003729 | RNA binding ; GO:0003723
				FBgn0024836	starry night	stan	G protein-coupled receptor signaling pathway ; GO:0007186 | homophilic cell adhesion via plasma membrane adhesion molecules ; GO:0007156 | axon guidance ; GO:0007411 | regulation of tube length, open tracheal system ; GO:0035159 | establishment of ommatidial planar polarity ; GO:0042067 | ommatidial rotation ; GO:0016318 | dendrite morphogenesis ; GO:0048813 | establishment of planar polarity ; G…	G protein-coupled receptor activity ; GO:0004930 | calcium ion binding ; GO:0005509 | transmembrane signaling receptor activity ; GO:0004888 | cell adhesion molecule binding ; GO:0050839
				FBgn0034708	Vacuolar protein sorting 35	Vps35	positive regulation of Wnt protein secretion ; GO:0061357 | retrograde transport, endosome to Golgi ; GO:0042147 | positive regulation of endosome to plasma membrane protein transport ; GO:1905751 | positive regulation of Wnt signaling pathway ; GO:0030177 | central nervous system neuron differentiation ; GO:0021953 | intracellular protein transport ; GO:0006886 | endocytosis ; GO:0006897 | regul…	protein binding ; GO:0005515 | Notch binding ; GO:0005112 | Rab GTPase binding ; GO:0017137
				FBgn0034709	Secreted Wg-interacting molecule	Swim	immune response ; GO:0006955 | positive regulation of canonical Wnt signaling pathway ; GO:0090263 | positive regulation of Wnt signaling pathway by establishment of Wnt protein localization to extracellular region ; GO:0035593 | proteolysis ; GO:0006508	polysaccharide binding ; GO:0030247 | scavenger receptor activity ; GO:0005044 | cysteine-type peptidase activity ; GO:0008234 | Wnt-protein binding ; GO:0017147
				FBgn0034903	sol narae	sona	proteolysis ; GO:0006508 | positive regulation of canonical Wnt signaling pathway ; GO:0090263 | positive regulation of Wnt protein secretion ; GO:0061357 | imaginal disc-derived appendage development ; GO:0048737	metalloendopeptidase activity ; GO:0004222
				FBgn0035142	Homeodomain interacting protein kinase	Hipk	imaginal disc-derived wing vein morphogenesis ; GO:0008586 | positive regulation of canonical Wnt signaling pathway ; GO:0090263 | protein stabilization ; GO:0050821 | protein phosphorylation ; GO:0006468 | positive regulation of gene expression ; GO:0010628 | peptidyl-serine phosphorylation ; GO:0018105 | compound eye development ; GO:0048749 | positive regulation of smoothened signaling pathway…	ATP binding ; GO:0005524 | protein serine/threonine kinase activity ; GO:0004674 | beta-catenin binding ; GO:0008013 | transcription factor binding ; GO:0008134 | protein tyrosine kinase activity ; GO:0004713
				FBgn0035153	earthbound 1	ebd1	positive regulation of canonical Wnt signaling pathway ; GO:0090263 | adult somatic muscle development ; GO:0007527 | positive regulation of transcription by RNA polymerase II ; GO:0045944	DNA binding ; GO:0003677 | RNA polymerase II transcription factor binding ; GO:0001085
				FBgn0004380	Kinesin-like protein at 64D	Klp64D	protein transport along microtubule ; GO:0098840 | microtubule-based movement ; GO:0007018 | sensory perception of smell ; GO:0007608 | anterograde axonal transport ; GO:0008089 | non-motile cilium assembly ; GO:1905515 | positive regulation of protein import into nucleus ; GO:0042307 | positive regulation of canonical Wnt signaling pathway ; GO:0090263 | sensory perception of sound ; GO:0007605 …	ATP binding ; GO:0005524 | microtubule motor activity ; GO:0003777 | ATP-dependent microtubule motor activity ; GO:1990939 | microtubule binding ; GO:0008017 | in ATPase activity ; GO:0016887
				FBgn0016756	Ubiquitin specific protease 47	Usp47	positive regulation of canonical Wnt signaling pathway ; GO:0090263 | compound eye cone cell differentiation ; GO:0042675 | protein stabilization ; GO:0050821 | protein deubiquitination ; GO:0016579 | negative regulation of proteasomal ubiquitin-dependent protein catabolic process ; GO:0032435 | regulation of chromatin silencing ; GO:0031935	thiol-dependent ubiquitin-specific protease activity ; GO:0004843 | cysteine-type endopeptidase activity ; GO:0004197
				FBgn0036141	wntless	wls	regulation of intracellular protein transport ; GO:0033157 | Wnt protein secretion ; GO:0061355 | segment polarity determination ; GO:0007367 | positive regulation of Wnt signaling pathway ; GO:0030177 | compound eye morphogenesis ; GO:0001745 | Golgi to plasma membrane protein transport ; GO:0043001 | positive regulation of protein secretion ; GO:0050714 | imaginal disc-derived wing morphogenesi…	Wnt-protein binding ; GO:0017147 | protein binding ; GO:0005515
				FBgn0036300	Phosphomannomutase type 2	Pmm2	GDP-mannose biosynthetic process ; GO:0009298 | mannose metabolic process ; GO:0006013 | cellular response to hypoxia ; GO:0071456 | protein N-linked glycosylation ; GO:0006487 | protein targeting to ER ; GO:0045047	phosphomannomutase activity ; GO:0004615
				FBgn0041604	dally-like	dlp	positive regulation of smoothened signaling pathway ; GO:0045880 | segment polarity determination ; GO:0007367 | positive regulation of canonical Wnt signaling pathway ; GO:0090263 | neuromuscular junction development ; GO:0007528 | positive regulation of Wnt signaling pathway ; GO:0030177 | positive regulation of fibroblast growth factor receptor signaling pathway ; GO:0045743 | axon guidance ; …	hedgehog family protein binding ; GO:0097108 | Wnt-protein binding ; GO:0017147
				FBgn0037098	Wnk kinase	Wnk	positive regulation of ion transmembrane transporter activity ; GO:0032414 | axon guidance ; GO:0007411 | positive regulation of potassium ion import across plasma membrane ; GO:1903288 | positive regulation of canonical Wnt signaling pathway ; GO:0090263 | protein phosphorylation ; GO:0006468 | intracellular signal transduction ; GO:0035556 | positive regulation of sodium ion transmembrane trans…	ATP binding ; GO:0005524 | chloride channel inhibitor activity ; GO:0019869 | protein serine/threonine kinase activity ; GO:0004674 | protein kinase activity ; GO:0004672 |potassium channel inhibitor activity ; GO:0019870
				FBgn0037325	-	CG12147	peptidyl-serine phosphorylation ; GO:0018105 | positive regulation of proteasomal ubiquitin-dependent protein catabolic process ; GO:0032436 | positive regulation of canonical Wnt signaling pathway ; GO:0090263 | protein phosphorylation ; GO:0006468	ATP binding ; GO:0005524 | protein serine/threonine kinase activity ; GO:0004674
				FBgn0037734	trabid	trbd	positive regulation of Wnt signaling pathway ; GO:0030177 | protein K63-linked deubiquitination ; GO:0070536 |cytoskeleton organization ; GO:0007010 | negative regulation of peptidoglycan recognition protein signaling pathway ; GO:0061060 | cell migration ; GO:0016477 | protein K29-linked deubiquitination ; GO:0035523 | protein K33-linked deubiquitination ; GO:1990168 | protein deubiquitination i…	thiol-dependent ubiquitinyl hydrolase activity ; GO:0036459 | protein binding ; GO:0005515 | K63-linked polyubiquitin modification-dependent protein binding ; GO:0070530 | Lys63-specific deubiquitinase activity ; GO:0061578 | thiol-dependent ubiquitin-specific protease activity ; GO:0004843
				FBgn0261279	liquid facets-Related	lqfR	oogenesis ; GO:0048477 | synaptic vesicle endocytosis ; GO:0048488 | neurotransmitter secretion ; GO:0007269 |vesicle-mediated transport ; GO:0016192
				FBgn0043900	pygopus	pygo	embryonic pattern specification ; GO:0009880 | imaginal disc-derived wing expansion ; GO:0048526 | wing disc morphogenesis ; GO:0007472 | transcription, DNA-templated ; GO:0006351 | positive regulation of transcription by RNA polymerase II ; GO:0045944 | delamination ; GO:0060232 | positive regulation of transcription by RNA polymerase II ; GO:0045944 | canonical Wnt signaling pathway ; GO:006007…	transcription coactivator activity ; GO:0003713 | methylated histone binding ; GO:0035064 | transcription coactivator activity ; GO:0003713
				FBgn0039907	legless	lgs	canonical Wnt signaling pathway ; GO:0060070 | sternite morphogenesis ; GO:0007491 | transcription, DNA-templated ; GO:0006351 | positive regulation of transcription by RNA polymerase II ; GO:0045944 | chitin-based larval cuticle pattern formation ; GO:0035293 | leg disc pattern formation ; GO:0035223 | segment polarity determination ; GO:0007367 | imaginal disc-derived wing margin morphogenesis …	transcription coactivator activity ; GO:0003713
				FBgn0003415	skuld	skd	compound eye development ; GO:0048749 | wing disc dorsal/ventral pattern formation ; GO:0048190 | chaeta development ; GO:0022416 | regulation of transcription by RNA polymerase II ; GO:0006357 | imaginal disc-derived leg segmentation ; GO:0036011 | transcription initiation from RNA polymerase II promoter ; GO:0006367 | sex comb development ; GO:0045498 | larval somatic muscle development ; GO:00…	transcription coregulator activity ; GO:0003712 | protein binding ; GO:0005515
				FBgn0016977	split ends	spen	transcription, DNA-templated ; GO:0006351 | segment specification ; GO:0007379 | establishment of thoracic bristle planar orientation ; GO:0048106 | imaginal disc-derived wing vein morphogenesis ; GO:0008586 | defense response to fungus ; GO:0050832 | wing disc pattern formation ; GO:0035222 | positive regulation of canonical Wnt signaling pathway ; GO:0090263 | axon guidance ; GO:0007411 | epide…	nucleic acid binding ; GO:0003676
				FBgn0001324	kohtalo	kto	compound eye development ; GO:0048749 | regulation of transcription by RNA polymerase II ; GO:0006357 | positive regulation of canonical Wnt signaling pathway ; GO:0090263 | imaginal disc-derived leg segmentation ; GO:0036011 | chaeta development ; GO:0022416 | ecdysone-mediated induction of salivary gland cell autophagic cell death ; GO:0035072 | sex comb development ; GO:0045498	transcription coregulator activity ; GO:0003712 | protein binding ; GO:0005515 | transcription coactivator activity ; GO:0003713
				FBgn0264492	casein kinase IIalpha	CkIIalpha	protein phosphorylation ; GO:0006468 | oocyte dorsal/ventral axis specification ; GO:0007310 | negative regulation of proteasomal ubiquitin-dependent protein catabolic process ; GO:0032435 | axon guidance ; GO:0007411 | locomotor rhythm ; GO:0045475 | mitotic cell cycle ; GO:0000278 | aggressive behavior ; GO:0002118 | compound eye development ; GO:0048749 | chaeta development ; GO:0022416 | pept…	ATP binding ; GO:0005524 | protein serine/threonine kinase activity ; GO:0004674 | protein binding ; GO:0005515
		GO:0030173	Integral component of Golgi membrane | Golgi integral membrane protein | integral to Golgi membrane. The component of the Golgi membrane consisting of the gene products and protein complexes having at least some part of their peptide sequence embedded in the hydrophobic region of the membrane.	FBgn0029849	ER GDP-fucose transporter	Efr	UDP-N-acetylglucosamine transmembrane transport ; GO:1990569 | GDP-fucose import into endoplasmic reticulum lumen ; GO:0036084 | protein O-linked fucosylation ; GO:0036066 | CMP-N-acetylneuraminate transmembrane transport ; GO:0015782 | UDP-xylose transmembrane transport ; GO:0015790 | GDP-mannose transmembrane transport ; GO:1990570 | UDP-glucuronic acid transmembrane transport ; GO:0015787 | he…	UDP-glucose transmembrane transporter activity ; GO:0005460 | UDP-xylose transmembrane transporter activity ; GO:0005464 | CMP-N-acetylneuraminate transmembrane transporter activity ; GO:0005456 | UDP-glucuronic acid transmembrane transporter activity ; GO:0005461 | GDP-fucose transmembrane transporter activity ; GO:0005457 | UDP-N-acetylglucosamine transmembrane transporter activity ; GO:0005462…
				FBgn0028375	heixuedian	heix	mitochondrion morphogenesis ; GO:0070584 | ubiquinone biosynthetic process via 3,4-dihydroxy-5-polyprenylbenzoate ; GO:0032194 | menaquinone biosynthetic process ; GO:0009234 | vitamin K biosynthetic process ; GO:0042371 | negative regulation of hemocyte proliferation ; GO:0035207 | larval lymph gland hemopoiesis ; GO:0035167 | negative regulation of hemocyte differentiation ; GO:0045611 | negati…	prenyltransferase activity ; GO:0004659
				FBgn0033814	Quiescin sulfhydryl oxidase 1	Qsox1	oxidation-reduction process ; GO:0055114 | cell redox homeostasis ; GO:0045454 | protein folding in endoplasmic reticulum ; GO:0034975 | protein folding ; GO:0006457	flavin-linked sulfhydryl oxidase activity ; GO:0016971 | protein disulfide isomerase activity ; GO:0003756
				FBgn0034849	-	CG3500	endoplasmic reticulum to Golgi vesicle-mediated transport ; GO:0006888	COPII adaptor activity ; GO:0097020
				FBgn0260862	Vesicle transport through interaction with t-SNAREs 1a	Vti1a	protein targeting to vacuole ; GO:0006623 | vesicle-mediated transport ; GO:0016192 | intra-Golgi vesicle-mediated transport ; GO:0006891 | vesicle fusion with Golgi apparatus ; GO:0048280 | endoplasmic reticulum to Golgi vesicle-mediated transport ; GO:0006888 | retrograde transport, endosome to Golgi ; GO:0042147 | vesicle fusion ; GO:0006906 | retrograde transport, endosome to Golgi ; GO:00421…	SNAP receptor activity ; GO:0005484 | SNARE binding ; GO:0000149
				FBgn0052380	SMSr	SMSr	sphingomyelin biosynthetic process ; GO:0006686 | ceramide biosynthetic process ; GO:0046513 | regulation of ceramide biosynthetic process ; GO:2000303 | sphingolipid biosynthetic process ; GO:0030148	ceramide cholinephosphotransferase activity ; GO:0047493 | sphingomyelin synthase activity ; GO:0033188
				FBgn0035944	-	CG5021	protein secretion ; GO:0009306 | vesicle-mediated transport ; GO:0016192
				FBgn0052069	-	CG32069	endoplasmic reticulum to Golgi vesicle-mediated transport ; GO:0006888	-
				FBgn0036695	PAPS transporter 2	Papst2	transmembrane transport ; GO:0055085 | 3'-phosphoadenosine 5'-phosphosulfate transport ; GO:0046963 |heparan sulfate proteoglycan biosynthetic process ; GO:0015012	3'-phosphoadenosine 5'-phosphosulfate transmembrane transporter activity ; GO:0046964 | transmembrane transporter activity ; GO:0022857
				FBgn0003089	pipe	pip	dorsal/ventral axis specification ; GO:0009950 | regulation of multicellular organism growth ; GO:0040014 | positive regulation of serine-type endopeptidase activity ; GO:1900005 | positive regulation of Toll signaling pathway ; GO:0045752 | embryonic pattern specification ; GO:0009880	sulfotransferase activity ; GO:0008146 | heparan sulfate sulfotransferase activity ; GO:0034483 | chondroitin sulfotransferase activity ; GO:0034481 | protein binding ; GO:0005515
				FBgn0011591	fringe	fng	compound eye morphogenesis ; GO:0001745 | germarium-derived egg chamber formation ; GO:0007293 | positive regulation of Notch signaling pathway ; GO:0045747 | cuticle pattern formation ; GO:0035017 | compound eye development ; GO:0048749 | regulation of Notch signaling pathway ; GO:0008593 | wing disc dorsal/ventral pattern formation ; GO:0048190 | imaginal disc-derived wing margin morphogenesis …	O-fucosylpeptide 3-beta-N-acetylglucosaminyltransferase activity ; GO:0033829 | acetylglucosaminyltransferase activity ; GO:0008375
				FBgn0037603	-	CG11753	Golgi to endosome transport ; GO:0006895 | Golgi to plasma membrane protein transport ; GO:0043001 | protein localization to Golgi apparatus ; GO:0034067	-
				FBgn0038524	slalom	sll	transmembrane transport ; GO:0055085 | heparan sulfate proteoglycan biosynthetic process ; GO:0015012 | 3'-phosphoadenosine 5'-phosphosulfate transport ; GO:0046963 | oocyte dorsal/ventral axis specification ; GO:0007310	3'-phosphoadenosine 5'-phosphosulfate transmembrane transporter activity ; GO:0046964 | transmembrane transporter activity ; GO:0022857
				FBgn0250820	medial glomeruli	meigo	response to endoplasmic reticulum stress ; GO:0034976 | UDP-galactose transmembrane transport ; GO:0072334 | dendrite guidance ; GO:0070983 | axon guidance ; GO:0007411 | protein N-linked glycosylation ; GO:0006487	UDP-galactose transmembrane transporter activity ; GO:0005459 | UDP-glucose transmembrane transporter activity ; GO:0005460 | transmembrane transporter activity ; GO:0022857
				FBgn0038918	Quiescin sulfhydryl oxidase 3	Qsox3	oxidation-reduction process ; GO:0055114 | cell redox homeostasis ; GO:0045454 | multicellular organism reproduction ; GO:0032504 | protein folding ; GO:0006457	protein disulfide isomerase activity ; GO:0003756 | flavin-linked sulfhydryl oxidase activity ; GO:0016971
				FBgn0038919	Quiescin sulfhydryl oxidase 2	Qsox2	oxidation-reduction process ; GO:0055114 | cell redox homeostasis ; GO:0045454 | multicellular organism reproduction ; GO:0032504 | protein folding ; GO:0006457	flavin-linked sulfhydryl oxidase activity ; GO:0016971 | protein disulfide isomerase activity ; GO:0003756 | oxidoreductase activity ; GO:0016491 | flavin-linked sulfhydryl oxidase activity ; GO:0016971
				FBgn0039450	Yip1d-interacting factor 1	Yif1	cell morphogenesis ; GO:0000902 | protein secretion ; GO:0009306 | endoplasmic reticulum to Golgi vesicle-mediated transport ; GO:0006888 | positive regulation of synapse pruning ; GO:1905808	-
				FBgn0039641	-	CG14511	transmembrane transport ; GO:0055085	UDP-N-acetylglucosamine transmembrane transporter activity ; GO:0005462 | transmembrane transporter activity ; GO:0022857 | UDP-xylose transmembrane transporter activity ; GO:0005464
				FBgn0051413	Quiescin sulfhydryl oxidase 4	Qsox4	oxidation-reduction process ; GO:0055114 | cell redox homeostasis ; GO:0045454 | multicellular organism reproduction ; GO:0032504 | protein folding ; GO:0006457	protein disulfide isomerase activity ; GO:0003756 | flavin-linked sulfhydryl oxidase activity ; GO:0016971
		GO:0045451	pole plasm oskar mRNA localization | establishment and maintenance of oskar mRNA localization in pole plasm | establishment and maintenance of pole plasm oskar mRNA localization | oocyte pole plasm oskar mRNA localization | pole plasm oskar mRNA localisation. Any process in which oskar mRNA is transported to, or maintained in, the oocyte pole plasm.	FBgn0029878	Protein interacting with APP tail-1	Pat1	pole plasm oskar mRNA localization ; GO:0045451 | regulation of microtubule-based movement ; GO:0060632	-
				FBgn0000319	Clathrin heavy chain	Chc	intracellular protein transport ; GO:0006886 | clathrin coat assembly ; GO:0048268 | secretory granule organization ; GO:0033363 | endocytosis ; GO:0006897 | liquid clearance, open tracheal system ; GO:0035002 | compound eye retinal cell programmed cell death ; GO:0046667 | regulation of growth ; GO:0040008 | positive regulation of autophagy ; GO:0010508 | pole plasm oskar mRNA localization ; GO:…	structural molecule activity ; GO:0005198 | protein binding ; GO:0005515 | clathrin light chain binding ; GO:0032051
				FBgn0000256	cappuccino	capu	actin nucleation ; GO:0045010 | actin filament-based process ; GO:0030029 | pole plasm RNA localization ; GO:0007316 | pole plasm assembly ; GO:0007315 | oogenesis ; GO:0048477 |actin filament organization ; GO:0007015 | chorion-containing eggshell formation ; GO:0007304 | pole plasm oskar mRNA localization ; GO:0045451	microtubule binding ; GO:0008017
				FBgn0000308	chickadee	chic	mitotic cytokinesis ; GO:0000281 | maintenance of protein location in cell ; GO:0032507 | cell morphogenesis ; GO:0000902 | positive regulation of axon regeneration ; GO:0048680 | larval central nervous system remodeling ; GO:0035193 | dorsal closure ; GO:0007391 | axon guidance ; GO:0007411 | actin filament polymerization ; GO:0030041 | positive regulation of axon extension involved in axon guid…	actin monomer binding ; GO:0003785 | protein binding ; GO:0005515
				FBgn0004838	Heterogeneous nuclear ribonucleoprotein at 27C	Hrb27C	pole plasm oskar mRNA localization ; GO:0045451 | negative regulation of oskar mRNA translation ; GO:0007319 | spermatogenesis ; GO:0007283 | regulation of RNA metabolic process ; GO:0051252 | regulation of mRNA splicing, via spliceosome ; GO:0048024 | positive regulation of border follicle cell migration ; GO:1903688 | axon guidance ; GO:0007411 | positive regulation of mRNA splicing, via splice…	mRNA 5'-UTR binding ; GO:0048027 | poly(U) RNA binding ; GO:0008266 | protein binding ; GO:0005515 | mRNA 3'-UTR binding ; GO:0003730 | single-stranded DNA binding ; GO:0003697 | RNA binding ; GO:0003723 | translation repressor activity ; GO:0030371 | mRNA binding ; GO:0003729 | poly(G) binding ; GO:0034046
				FBgn0261064	Rabenosyn-5	Rbsn-5	endosomal vesicle fusion ; GO:0034058 | plasma membrane to endosome transport ; GO:0048227 | pole plasm oskar mRNA localization ; GO:0045451 | endocytosis ; GO:0006897 | oocyte microtubule cytoskeleton polarization ; GO:0008103 | regulation of endocytosis ; GO:0030100 | establishment of imaginal disc-derived wing hair orientation ; GO:0001737	nucleic acid binding ; GO:0003676 | metal ion binding ; GO:0046872 | small GTPase binding ; GO:0031267 | protein binding ; GO:0005515
				FBgn0015797	Rab6	Rab6	Rab protein signal transduction ; GO:0032482 | compound eye morphogenesis ; GO:0001745 | oocyte microtubule cytoskeleton polarization ; GO:0008103 | vesicle-mediated transport ; GO:0016192 | R7 cell development ; GO:0045467 | retrograde vesicle-mediated transport, Golgi to endoplasmic reticulum ; GO:0006890 | intracellular protein transport ; GO:0006886 | phototransduction ; GO:0007602 | pole pla…	GTP binding ; GO:0005525 | GTPase activity ; GO:0003924 | protein binding ; GO:0005515
				FBgn0033378	tsunagi	tsu	regulation of pole plasm oskar mRNA localization ; GO:0007317 | oocyte nucleus localization involved in oocyte dorsal/ventral axis specification ; GO:0051663 | RNA splicing ; GO:0008380 | establishment of pole plasm mRNA localization ; GO:0046595 | negative regulation of transposition, DNA-mediated ; GO:0000335 | regulation of alternative mRNA splicing, via spliceosome ; GO:0000381 | pole plasm o…	mRNA binding ; GO:0003729 | protein binding ; GO:0005515
				FBgn0001308	Kinesin heavy chain	Khc	intracellular distribution of mitochondria ; GO:0048312 | pole plasm oskar mRNA localization ; GO:0045451 | anterograde axonal transport of mitochondrion ; GO:0098957 | axo-dendritic transport ; GO:0008088 | stress granule disassembly ; GO:0035617 | mitochondrion distribution ; GO:0048311 | synaptic vesicle transport ; GO:0048489 | microtubule sliding ; GO:0051012 | oocyte dorsal/ventral axis spe…	ATP binding ; GO:0005524 | ATP-dependent microtubule motor activity, plus-end-directed ; GO:0008574 | ATPase activity ; GO:0016887 | tropomyosin binding ; GO:0005523 | microtubule motor activity ; GO:0003777 | motor activity ; GO:0003774 | microtubule binding ; GO:0008017
				FBgn0003520	staufen	stau	regulation of oskar mRNA translation ; GO:0046011 | intracellular mRNA localization ; GO:0008298 | anterior/posterior axis specification, embryo ; GO:0008595 | pole plasm protein localization ; GO:0007318 | long-term memory ; GO:0007616 | bicoid mRNA localization ; GO:0045450 | pole plasm oskar mRNA localization ; GO:0045451 | pole plasm protein localization ; GO:0007318 | regulation of pole plas…	mRNA 3'-UTR binding ; GO:0003730 | double-stranded RNA binding ; GO:0003725 | protein binding ; GO:0005515 | mRNA binding ; GO:0003729 | RNA binding ; GO:0003723 | microtubule binding ; GO:0008017
				FBgn0000615	exuperantia	exu	bicoid mRNA localization ; GO:0045450 | pole plasm oskar mRNA localization ; GO:0045451 | embryonic development via the syncytial blastoderm ; GO:0001700 | regulation of pole plasm oskar mRNA localization ; GO:0007317 | spermatogenesis ; GO:0007283 | anterior/posterior axis specification, embryo ; GO:0008595 | ovarian nurse cell to oocyte transport ; GO:0007300 | mRNA splicing, via spliceosome ; …	exonuclease activity ; GO:0004527 | protein homodimerization activity ; GO:0042803 | single-stranded RNA binding ; GO:0003727 | protein binding ; GO:0005515
				FBgn0002736	mago nashi	mago	pole plasm assembly ; GO:0007315 | microtubule cytoskeleton organization ; GO:0000226 | mRNA splicing, via spliceosome ; GO:0000398 | RNA splicing ; GO:0008380 | pole plasm oskar mRNA localization ; GO:0045451 | oogenesis ; GO:0048477 | oocyte microtubule cytoskeleton polarization ; GO:0008103 | maintenance of pole plasm mRNA location ; GO:0046594 | oocyte microtubule cytoskeleton organization ; …	protein binding ; GO:0005515
				FBgn0000562	egalitarian	egl	nucleobase-containing compound metabolic process ; GO:0006139 | oocyte nucleus migration involved in oocyte dorsal/ventral axis specification ; GO:0007312 | intracellular mRNA localization ; GO:0008298 | regulation of oskar mRNA translation ; GO:0046011 | pole plasm oskar mRNA localization ; GO:0045451 | oogenesis ; GO:0048477 | larval salivary gland morphogenesis ; GO:0007436 | intracellular mRN…	3'-5' exonuclease activity ; GO:0008408 | mRNA binding ; GO:0003729
				FBgn0034921	Decapping protein 1	DCP1	positive regulation of catalytic activity ; GO:0043085 | deadenylation-dependent decapping of nuclear-transcribed mRNA ; GO:0000290 | nuclear-transcribed mRNA catabolic process, nonsense-mediated decay ; GO:0000184 | deadenylation-independent decapping of nuclear-transcribed mRNA ; GO:0031087 | pole plasm oskar mRNA localization ; GO:0045451 | gene silencing by miRNA ; GO:0035195 | regulation of …	enzyme activator activity ; GO:0008047 | mRNA binding ; GO:0003729 | protein binding ; GO:0005515 | m7G(5')pppN diphosphatase activity ; GO:0050072 | enzyme regulator activity ; GO:0030234
				FBgn0263594	lost	lost	pole plasm mRNA localization ; GO:0019094 | pole plasm oskar mRNA localization ; GO:0045451 | pole cell development ; GO:0007277 | mRNA splicing, via spliceosome ; GO:0000398 | anterior/posterior pattern specification ; GO:0009952	-
				FBgn0037573	-	CG7483	RNA splicing ; GO:0008380 | pole plasm oskar mRNA localization ; GO:0045451 | chromatin organization ; GO:0006325 | mRNA splicing, via spliceosome ; GO:0000398 | exon-exon junction complex assembly ; GO:1903040 | positive regulation of gene expression ; GO:0010628	ATP binding ; GO:0005524 | RNA helicase activity ; GO:0003724 | mRNA binding ; GO:0003729 | protein binding ; GO:0005515 | RNA binding ; GO:0003723
				FBgn0259139	glorund	glo	maternal specification of dorsal/ventral axis, oocyte, germ-line encoded ; GO:0007311 | regulation of translation ; GO:0006417 | pole plasm oskar mRNA localization ; GO:0045451 | chromosome organization ; GO:0051276 | intracellular mRNA localization involved in pattern specification process ; GO:0060810 | wound healing ; GO:0042060	nucleic acid binding ; GO:0003676 | protein binding ; GO:0005515 | mRNA binding ; GO:0003729
				FBgn0263396	squid	sqd	intracellular mRNA localization ; GO:0008298 | pole plasm oskar mRNA localization ; GO:0045451 |oocyte anterior/posterior axis specification ; GO:0007314 | regulation of alternative mRNA splicing, via spliceosome ; GO:0000381 | dorsal/ventral pattern formation ; GO:0009953 | dorsal/ventral axis specification, ovarian follicular epithelium ; GO:0008069 | intracellular mRNA localization ; GO:000829…	mRNA binding ; GO:0003729 | mRNA binding ; GO:0003729 | sequence-specific DNA binding ; GO:0043565 | mRNA 3'-UTR binding ; GO:0003730 | sequence-specific double-stranded DNA binding ; GO:1990837 | RNA binding ; GO:0003723
				FBgn0038167	Lkb1 kinase	Lkb1	regulation of cell growth ; GO:0001558 | establishment of cell polarity ; GO:0030010 | glucose homeostasis ; GO:0042593 | determination of adult lifespan ; GO:0008340 | intracellular signal transduction ; GO:0035556 | mitotic spindle organization ; GO:0007052 | protein phosphorylation ; GO:0006468 | border follicle cell delamination ; GO:0030709 | mitotic spindle organization ; GO:0007052 | prote…	ATP binding ; GO:0005524 | protein kinase activator activity ; GO:0030295 | protein serine/threonine kinase activity ; GO:0004674 | protein binding ; GO:0005515
				FBgn0003721	Tropomyosin 1	Tm1	pole plasm oskar mRNA localization ; GO:0045451 | actin filament organization ; GO:0007015 | dendrite morphogenesis ; GO:0048813 | pole plasm assembly ; GO:0007315 | pole plasm oskar mRNA localization ; GO:0045451 | muscle contraction ; GO:0006936 | stress fiber assembly ; GO:0043149 | response to hyperoxia ; GO:0055093 | muscle contraction ; GO:0006936 | oogenesis ; GO:0048477 | regulation of la…	actin filament binding ; GO:0051015 | actin binding ; GO:0003779 | protein kinase binding ; GO:0019901 | kinesin binding ; GO:0019894
				FBgn0003483	spindle E	spn-E	oocyte localization involved in germarium-derived egg chamber formation ; GO:0030720 | regulation of pole plasm oskar mRNA localization ; GO:0007317 | RNA localization ; GO:0006403 | chromatin silencing ; GO:0006342 | oogenesis ; GO:0048477 | intracellular mRNA localization ; GO:0008298 | germarium-derived oocyte fate determination ; GO:0007294 | oocyte maturation ; GO:0001556 | polarity specific…	ATP binding ; GO:0005524 | helicase activity ; GO:0004386 | RNA binding ; GO:0003723 |RNA-dependent ATPase activity ; GO:0008186 | RNA helicase activity ; GO:0003724
				FBgn0262975	cap-n-collar	cnc	positive regulation of transcription by RNA polymerase II ; GO:0045944 | head development ; GO:0060322 | response to oxidative stress ; GO:0006979 | intestinal stem cell homeostasis ; GO:0036335 | regulation of pole plasm oskar mRNA localization ; GO:0007317 | dendrite morphogenesis ; GO:0048813 | pharynx development ; GO:0060465 | blastoderm segmentation ; GO:0007350 | response to endoplasmic re…	DNA binding ; GO:0003677 | DNA-binding transcription factor activity ; GO:0003700 | protein heterodimerization activity ; GO:0046982
				FBgn0004882	oo18 RNA-binding protein	orb	pole plasm oskar mRNA localization ; GO:0045451 | regulation of oskar mRNA translation ; GO:0046011 | mRNA polyadenylation ; GO:0006378 | dorsal/ventral axis specification, ovarian follicular epithelium ; GO:0008069 | oocyte anterior/posterior axis specification ; GO:0007314 | oocyte dorsal/ventral axis specification ; GO:0007310 | negative regulation of cytoplasmic translation ; GO:2000766 | ger…	mRNA binding ; GO:0003729 | translation factor activity, RNA binding ; GO:0008135 | protein binding ; GO:0005515 | translation repressor activity, mRNA regulatory element binding ; GO:0000900 | ribosome binding ; GO:0043022 | mRNA 3'-UTR binding ; GO:0003730
				FBgn0004510	Ets at 97D	Ets97D	regulation of transcription by RNA polymerase II ; GO:0006357 | positive regulation of transcription by RNA polymerase II ; GO:0045944 | cell differentiation ; GO:0030154 | cellular response to starvation ; GO:0009267 | positive regulation of oxidative phosphorylation ; GO:1903862 | regulation of mitochondrion organization ; GO:0010821 | regulation of glutamine family amino acid metabolic process…	sequence-specific DNA binding ; GO:0043565 | DNA-binding transcription factor activity, RNA polymerase II-specific ; GO:00009810
				FBgn0045862	barentsz	btz	mRNA processing ; GO:0006397 | bicoid mRNA localization ; GO:0045450 | oocyte microtubule cytoskeleton polarization ; GO:0008103 | pole plasm oskar mRNA localization ; GO:0045451 | oocyte microtubule cytoskeleton polarization ; GO:0008103 | pole plasm protein localization ; GO:0007318 | pole plasm oskar mRNA localization ; GO:0045451 | RNA splicing ; GO:0008380	RNA binding ; GO:0003723 | translation initiation factor binding ; GO:0031369
				FBgn0021825	Dynactin 2, p50 subunit	DCTN2-p50	mitotic spindle organization ; GO:0007052 | pole plasm oskar mRNA localization ; GO:0045451 | phototransduction ; GO:0007602 | clathrin-dependent endocytosis involved in vitellogenesis ; GO:0061883 | mitotic metaphase plate congression ; GO:0007080 | oocyte microtubule cytoskeleton organization ; GO:0016325 | mRNA transport ; GO:0051028 | oogenesis ; GO:0048477 | positive regulation of retrograde…	-
				FBgn0003475	spire	spir	vesicle-mediated transport ; GO:0016192 | pole plasm oskar mRNA localization ; GO:0045451 | actin cytoskeleton organization ; GO:0030036 | actin filament organization ; GO:0007015 | oogenesis ; GO:0048477 | oocyte karyosome formation ; GO:0030717 | pole plasm RNA localization ; GO:0007316 | pole plasm assembly ; GO:0007315 | actin nucleation ; GO:0045010 | chorion-containing eggshell formation ; …	actin binding ; GO:0003779 | protein binding ; GO:0005515 | microtubule binding ; GO:0008017
				FBgn0260934	par-1	par-1	vesicle-mediated transport ; GO:0016192 | pole plasm oskar mRNA localization ; GO:0045451 | actin cytoskeleton organization ; GO:0030036 | actin filament organization ; GO:0007015 | oogenesis ; GO:0048477 | oocyte karyosome formation ; GO:0030717 | pole	ATP binding ; GO:0005524 | tau-protein kinase activity ; GO:0050321 | protein serine/threonine kinase activity ; GO:0004674
	Males	GO:0005740	mitochondrial envelope. The double lipid bilayer enclosing the mitochondrion and separating its contents from the cell cytoplasm; includes the intermembrane space.	FBgn0029870	Mitochondrial assembly regulatory factor	Marf	mitochondrial fusion ; GO:0008053 | response to endoplasmic reticulum stress ; GO:0034976 | mitochondrion localization ; GO:0051646 | lipid droplet organization ; GO:0034389 | axonal transport of mitochondrion ; GO:0019896 | mitochondrion organization ; GO:0007005 | ecdysone biosynthetic process ; GO:0006697 | mitochondrion morphogenesis ; GO:0070584 | adult locomotory behavior ; GO:0008344 | reg…	GTP binding ; GO:0005525 | GTPase activity ; GO:0003924
				FBgn0031263	Translocator protein	Tspo	regulation of oxidative phosphorylation ; GO:0002082 | positive regulation of apoptotic process ; GO:0043065 | determination of adult lifespan ; GO:0008340	-
				FBgn0034497	Mitochondrial phosphate carrier protein 1	Mpcp1	phosphate ion transport ; GO:0006817 | phosphate ion transmembrane transport ; GO:0035435	inorganic phosphate transmembrane transporter activity ; GO:0005315 | phosphate ion transmembrane transporter activity ; GO:0015114
				FBgn0027615	OXA1L mitochondrial inner membrane protein	OXA1L	protein insertion into mitochondrial inner membrane from matrix ; GO:0032979 | respiratory chain complex IV assembly ; GO:0008535 | protein insertion into membrane ; GO:0051205 | mitochondrial respiratory chain complex IV assembly ; GO:0033617	membrane insertase activity ; GO:0032977
				FBgn0026409	Mitochondrial phosphate carrier protein 2	Mpcp2	phosphate ion transmembrane transport ; GO:0035435 | phosphate ion transport ; GO:0006817 | wing disc dorsal/ventral pattern formation ; GO:0048190	phosphate ion transmembrane transporter activity ; GO:0015114 | inorganic phosphate transmembrane transporter activity ; GO:0005315
				FBgn0011596	fuzzy onions	fzo	mitochondrial fusion ; GO:0008053 | Nebenkern assembly ; GO:0007287 | mitochondrion localization ; GO:0051646 | sperm mitochondrion organization ; GO:0030382 | spermatogenesis ; GO:0007283	GTP binding ; GO:0005525 | GTPase activity ; GO:0003924
				FBgn0029131	Death executioner Bcl-2	Debcl	positive regulation of macroautophagy ; GO:0016239 | apoptotic process ; GO:0006915 | autophagy ; GO:0006914 | cellular response to starvation ; GO:0009267 | apoptotic process involved in morphogenesis ; GO:0060561 | negative regulation of apoptotic process ; GO:0043066 | apoptotic process ; GO:0006915 |negative regulation of neuron apoptotic process ; GO:0043524 | neuron cellular homeostasis ; G…	protein heterodimerization activity ; GO:0046982 | protein homodimerization activity ; GO:0042803
		GO:0042274	ribosomal small subunit biogenesis | ribosomal small subunit biogenesis and assembly. A cellular process that results in the biosynthesis of constituent macromolecules, assembly, and arrangement of constituent parts of a small ribosomal subunit; includes transport to the sites of protein synthesis.	FBgn0261592	Ribosomal protein S6	RpS6	translation ; GO:0006412 | cytoplasmic translation ; GO:0002181 | immune response ; GO:0006955	structural constituent of ribosome ; GO:0003735
				FBgn0030063	-	CG1789	rRNA processing ; GO:0006364 | translation ; GO:0006412
				FBgn0086912	mushroom body miniature	mbm	mushroom body development ; GO:0016319 | adult walking behavior ; GO:0007628 | learning ; GO:0007612 | visual behavior ; GO:0007632 | olfactory learning ; GO:0008355 | ribosomal small subunit biogenesis ; GO:0042274	zinc ion binding ; GO:0008270 | nucleic acid binding ; GO:0003676
				FBgn0027525	LTV1 ribosome biogenesis factor	LTV1	ribosomal small subunit export from nucleus ; GO:0000056 | rRNA processing ; GO:0006364 | ribosomal small subunit biogenesis ; GO:0042274	protein binding ; GO:0005515 | ribosome binding ; GO:0043022
				FBgn0035336	-	CG9004	ribosomal small subunit biogenesis ; GO:0042274	RNA binding ; GO:0003723
				FBgn0038746	Surfeit 6	Surf6	ribosome biogenesis ; GO:0042254 | ventral cord development ; GO:0007419 | ribosomal small subunit biogenesis ; GO:0042274 | ribosomal large subunit biogenesis ; GO:0042273	DNA binding ; GO:0003677 | nucleic acid binding ; GO:0003676 | RNA binding ; GO:0003723
				FBgn0039757	Ribosomal protein S7	RpS7	translation ; GO:0006412 | ribosomal small subunit biogenesis ; GO:0042274 | rRNA processing ; GO:0006364	structural constituent of ribosome ; GO:0003735
				FBgn0021875	Zinc finger protein RP-8	Zfrp8	ribosomal small subunit biogenesis ; GO:0042274 | embryonic hemopoiesis ; GO:0035162 | oogenesis ; GO:0048477 | regulation of cytoplasmic translation ; GO:2000765 | somatic stem cell division ; GO:0048103	ribosomal small subunit binding ; GO:0043024
				FBgn0010926	lethal (3) 07882	l(3)07882	ribosomal small subunit biogenesis ; GO:0042274 | rRNA processing ; GO:0006364 | maturation of SSU-rRNA ; GO:0030490	snoRNA binding ; GO:0030515
		GO:0030336	negative regulation of cell migration | down regulation of cell migration | down-regulation of cell migration | downregulation of cell migration | inhibition of cell migration. Any process that stops, prevents, or reduces the frequency, rate or extent of cell migration.	FBgn0266000	-	CG44774	negative regulation of cell migration ; GO:0030336
				FBgn0003328
				FBgn0026379	Phosphatase and tensin homolog	Pten	phosphatidylinositol dephosphorylation ; GO:0046856 | negative regulation of phosphatidylinositol 3-kinase signaling ; GO:0014067 | regulation of cell junction assembly ; GO:1901888 | lipid homeostasis ; GO:0055088 | larval midgut histolysis ; GO:0035069 | negative regulation of multicellular organism growth ; GO:0040015 | negative regulation of insulin receptor signaling pathway ; GO:0046627 | r…	protein tyrosine/serine/threonine phosphatase activity ; GO:0008138 | protein tyrosine phosphatase activity ; GO:0004725 | phosphatidylinositol-3,4,5-trisphosphate 3-phosphatase activity ; GO:0016314 | inositol-1,3,4,5-tetrakisphosphate 3-phosphatase activity ; GO:0051717 | phosphoprotein phosphatase activity ; GO:0004721 | protein serine/threonine phosphatase activity ; GO:0004722 | PDZ domain b…
				FBgn0004657	myospheroid	mys	cell adhesion mediated by integrin ; GO:0033627 | germ-line stem cell population maintenance ; GO:0030718 | heterophilic cell-cell adhesion via plasma membrane cell adhesion molecules ; GO:0007157 | dorsal closure ; GO:0007391 | ventral cord development ; GO:0007419 | cell adhesion mediated by integrin ; GO:0033627 | calcium-dependent cell-cell adhesion via plasma membrane cell adhesion molecules…	integrin binding ; GO:0005178 | extracellular matrix protein binding ; GO:1990430 | protein binding ; GO:0005515 | protein heterodimerization activity ; GO:0046982
				FBgn0040208	Katanin 60	Kat60	cytoplasmic microtubule organization ; GO:0031122 | microtubule depolymerization ; GO:0007019 | microtubule severing ; GO:0051013 | mitotic sister chromatid segregation ; GO:0000070 | regulation of synaptic growth at neuromuscular junction ; GO:0008582 | dendrite development ; GO:0016358 | negative regulation of cell migration ; GO:0030336	microtubule binding ; GO:0008017 | ATP binding ; GO:0005524 | microtubule-severing ATPase activity ; GO:0008568 | ATPase activity ; GO:0016887 | myosin binding ; GO:0017022
